# Supplementary material for: Real-world impact of emicizumab and immunosuppression on acquired hemophilia A: a multicenter US cohort
Source: PubMed Central journal article supplement — Blood Adv. 2024 Sep 23;8(22):5896–905. doi: 10.1182/bloodadvances.2024013882 (PMC11612364; doi:10.1182/bloodadvances.2024013882), 2024-09-23

Supplemental Table 1. Description of all Breakthrough Bleeds that Occurred during Emicizumab Maintenance ( $\geq 4$  weeks on Emicizumab), n=5.

| Description of Bleed                 | Age | Trigger of Bleed | Severity <sup>a</sup> | Emicizumab Maintenance Regimen | Emicizumab Dosage Changes in Response to Bleed | IST Regimen                                  | Rescue Hemostatic Agents Used | Procedures                                       | Transfusions  | Anticoagulants/Antiplatelets |
|--------------------------------------|-----|------------------|-----------------------|--------------------------------|------------------------------------------------|----------------------------------------------|-------------------------------|--------------------------------------------------|---------------|------------------------------|
| Gastrointestinal bleed               | 75  | Spontaneous      | Severe                | 3 mg/kg every 2 weeks          | None                                           | None                                         | FVIII product, rFVIIa         | Yes, Endoscopy and clips placed on gastric ulcer | Yes, 1 x pRBC | No                           |
| Gastrointestinal bleed               | 71  | Spontaneous      | Severe                | 1.5 mg/kg weekly               | None                                           | Rituximab, Glucocorticoid & Cyclophosphamide | rFVIIa, antifibrinolytic      | Yes, Endoscopy                                   | Yes, 7 x pRBC | No                           |
| Subcutaneous bleed in left arm       | 57  | Trauma           | Non-severe            | 1.5 mg/kg weekly               | None                                           | Rituximab, Glucocorticoid & Cyclophosphamide | rFVIIa                        | No                                               | No            | No                           |
| Left elbow hemarthrosis <sup>b</sup> | 89  | Trauma           | Non-severe            | 1.5 mg/kg every 2 weeks        | None                                           | Rituximab & Mycophenolate mofetil            | rFVIIa                        | No                                               | No            | No                           |
| Left knee hemarthrosis <sup>b</sup>  | 89  | Trauma           | Non-severe            | 1.5 mg/kg every 2 weeks        | None                                           | Rituximab & Mycophenolate mofetil            | rFVIIa                        | No                                               | No            | No                           |
| Right knee hemarthrosis              | 69  | Procedural       | Non-severe            | 1.5 mg/kg every 2 weeks        | Increased to 1.5 mg/kg weekly                  | Mycophenolate mofetil monotherapy            | rpFVIII, rFVIIa               | No                                               | No            | No                           |

Recombinant activated factor VII (rFVIIa), Factor VIII (FVIII), Recombinant porcine factor VIII, Packed red blood cells (pRBC)

<sup>a</sup> A severe breakthrough bleed is defined as a drop in hemoglobin  $> 2$ g/dL, requiring  $>2$  red blood cell transfusions, and/or organ-, limb- or life-threatening.

<sup>b</sup> These bleeds occurred separately in the same patient.

Supplement Table 2. Characteristics and Disease Course of AHA Patients With at least 12 Weeks of Follow-Up by Immunosuppression Therapy (IST) Regimen, n=55.

|                                                                  | None, n=4        | Glucocorticoids Monotherapy, n=6 | Glucocorticoids & Cyclophosphamide, n=3 | Rituximab & Glucocorticoids, n=10 | Rituximab Monotherapy, n=14 | Rituximab & Other IST, n=17 | MMF Monotherapy n=1 | Total, n=55      |
|------------------------------------------------------------------|------------------|----------------------------------|-----------------------------------------|-----------------------------------|-----------------------------|-----------------------------|---------------------|------------------|
| <b>IST Initiation Timing</b>                                     | NA               |                                  |                                         |                                   |                             |                             |                     |                  |
| Pre-emicizumab                                                   |                  | 3 (50%)                          | 1 (33%)                                 | 5 (50%)                           | 6 (43%)                     | 12 (71%)                    | 1 (100%)            | 28 (55%)         |
| ±1 week emicizumab                                               |                  | 3 (50%)                          | 2 (67%)                                 | 4 (40%)                           | 5 (36%)                     | 3 (18%)                     | 0 (0%)              | 17 (33%)         |
| Post-emicizumab                                                  |                  | 0 (0%)                           | 0 (0%)                                  | 0 (0%)                            | 1 (7%)                      | 0 (0%)                      | 0 (0%)              | 1 (2%)           |
| Unknown                                                          |                  | 0 (0%)                           | 0 (0%)                                  | 1 (10%)                           | 2 (14%)                     | 2 (12%)                     | 0 (0%)              | 5 (10%)          |
| <b>Recent FVIII Activity Level,<sup>a</sup> median, (range)</b>  | 232%, (48%-246%) | 71%, (<1%-230%)                  | <4%, (<4%-<4%)                          | 111%, (2.5%-255%)                 | 115%, (<1%-320%)            | 113%, (<1%-515%)            | 8%                  | 111%, (<1%-515%) |
| <b>Recent FVIII Inhibitor Titer,<sup>b</sup> median, (range)</b> | <0.6, (<0.3-2.3) | 1, (<0.6-423)                    | 53, (5.6-100)                           | <0.5, (<0.5-22.3)                 | <0.5, (<0.5-56)             | <0.6, (<0.3-11)             | 0.4                 | <0.6, (<0.3-423) |
| <b>Emicizumab Initiation Timing, median, (range)</b>             |                  |                                  |                                         |                                   |                             |                             |                     |                  |
| Time from diagnosis to emicizumab initiation (weeks)             | 6, (2-9)         | 2, (1-13)                        | 4, (2-38)                               | 7, (0-246)                        | 1, (0-76)                   | 7, (0-130)                  | 8                   | 3, (0-246)       |
| Time on emicizumab (weeks) <sup>c</sup>                          | 40, (12-52)      | 13, (1-20)                       | 28, (28-28)                             | 3, (1-15)                         | 7, (4-52)                   | 10, (1-46)                  | Ongoing             | 10, (0-48)       |
| <b>Relevant Medications</b>                                      |                  |                                  |                                         |                                   |                             |                             |                     |                  |
| Still on emicizumab at time of survey                            | 1 (25%)          | 3 (50%)                          | 2 (67%)                                 | 2 (20%)                           | 2 (14%)                     | 2 (12%)                     | 1 (100%)            | 13 (24%)         |
| Still on IST at time of survey                                   | NA               | 1 (17%)                          | 1 (33%)                                 | 0 (0%)                            | 1 (7%)                      | 2 (12%)                     | 1 (100%)            | 6 (11%)          |
| <b>Hospitalizations (days) median, (range)</b>                   |                  |                                  |                                         |                                   |                             |                             |                     |                  |
| Pre-emicizumab                                                   | 31, (9-53)       | 10, (3-60)                       | 2, (0-5)                                | 11, (4-75)                        | 11, (0-18)                  | 17, (0-55)                  | 29                  | 11, (0-75)       |
| Post-emicizumab                                                  | 0, (0-28)        | 6, (0-24)                        | 0, (0-1)                                | 6, (0-12)                         | 4, (0-26)                   | 4, (0-30)                   | 22                  | 4, (0-30)        |
| <b>Pre-emicizumab Bleeding History</b>                           |                  |                                  |                                         |                                   |                             |                             |                     |                  |
| Patients with acute bleeds                                       | 3 (75%)          | 6 (100%)                         | 3 (100%)                                | 9 (90%)                           | 14 (100%)                   | 16 (94%)                    | 1 (100%)            | 52 (95%)         |
| Patients with severe acute bleeds                                | 1 (25%)          | 6 (100%)                         | 2 (67%)                                 | 6 (60%)                           | 13 (93%)                    | 14 (82%)                    | 1 (100%)            | 43 (78%)         |
| Patients requiring hemostatic treatment                          | 2 (50%)          | 6 (100%)                         | 2 (67%)                                 | 8 (80%)                           | 8 (57%)                     | 16 (94%)                    | 1 (100%)            | 43 (78%)         |
| <b>Post-emicizumab Breakthrough Bleeding</b>                     |                  |                                  |                                         |                                   |                             |                             |                     |                  |
| Total no. of bleeds                                              | 2                | 0                                | 0                                       | 0                                 | 2                           | 5                           | 1                   | 10               |

|                                             |         |                      |         |                      |                     |                     |        |        |
|---------------------------------------------|---------|----------------------|---------|----------------------|---------------------|---------------------|--------|--------|
| No. of bleeds during emicizumab loading     | 1       | 0                    | 0       | 0                    | 2                   | 1                   | 0      | 4      |
| No. of bleeds during emicizumab maintenance | 1       | 0                    | 0       | 0                    | 0                   | 4                   | 1      | 6      |
| No. of severe breakthrough bleeds           | 1       | 0                    | 0       | 0                    | 1                   | 1                   | 0      | 3      |
| <b>Pre-emicizumab AEs</b>                   |         |                      |         |                      |                     |                     |        |        |
| Patients with IST-related AEs               | NA      | 2 (33%) <sup>d</sup> | 0 (0%)  | 1 (10%) <sup>f</sup> | 1 (7%) <sup>e</sup> | 1 (6%) <sup>f</sup> | 0 (0%) | 5 (9%) |
| Patients with other AEs                     | 1 (25%) | 1 (17%)              | 0 (0%)  | 1 (10%)              | 1 (7%)              | 1 (6%)              | 0 (0%) | 5 (9%) |
| <b>Post-emicizumab AEs</b>                  |         |                      |         |                      |                     |                     |        |        |
| Patients with IST-related AEs               | NA      | 0 (0%)               | 0 (0%)  | 0 (0%)               | 0 (0%)              | 0 (0%)              | 0 (0%) | 0 (0%) |
| Patients with other AEs                     | 0 (0%)  | 1 (17%)              | 1 (33%) | 1 (10%)              | 0 (0%)              | 1 (6%)              | 0 (0%) | 4 (7%) |

Factor VIII (FVIII), Adverse Events (AEs)

<sup>a</sup> FVIII activity level was measured with either a one-stage or chromogenic assay.

<sup>b</sup> FVIII inhibitor titer units are BU/mL

<sup>c</sup> Time on emicizumab was only calculated for patients who had discontinued emicizumab at time of survey (n=42)

<sup>d</sup> The two IST-related AEs were hyperglycemia and encephalopathy.

<sup>e</sup> The IST-related AE was a hypersensitivity reaction.

<sup>f</sup> The IST-related AE was an infusion reaction.

Supplemental Figure 1. Acute Bleeds and Rescue Treatments, Pre- and Post-Emicizumab Initiation for Total Cohort (n=62).

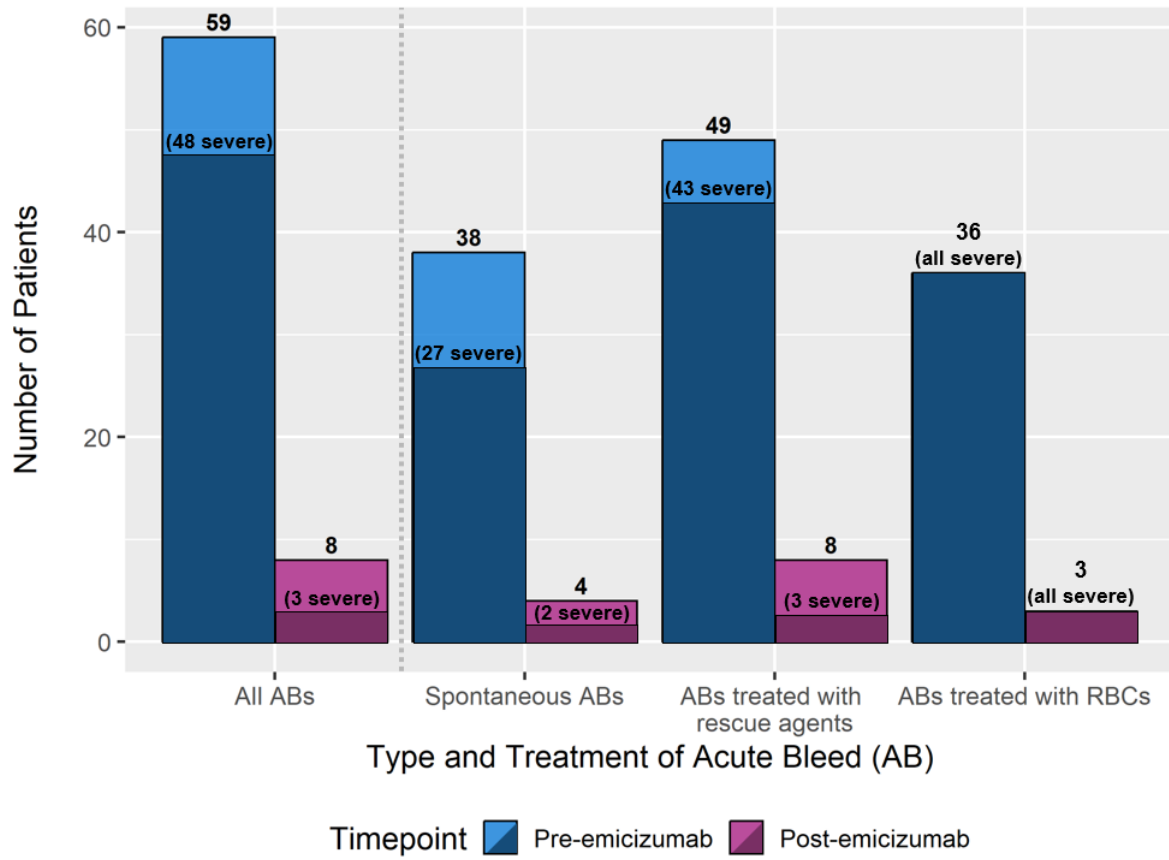

Supplemental Figure 2. Flowchart of Breakthrough Bleeds for Total Cohort, n=62

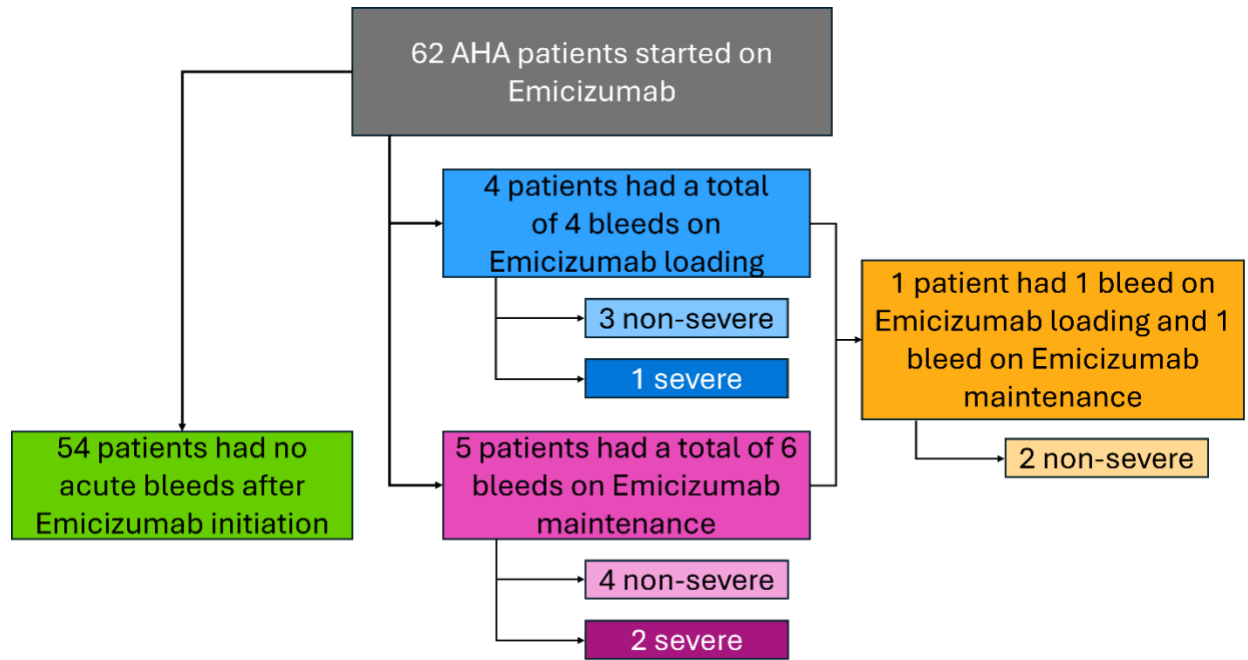

Supplement Figure 3. Comparison of Immunosuppression Therapy Regimens among AHA Patients with at least 12 Weeks of Follow-Up in Complete Remission, Not in Remission, or Deceased, n=50.

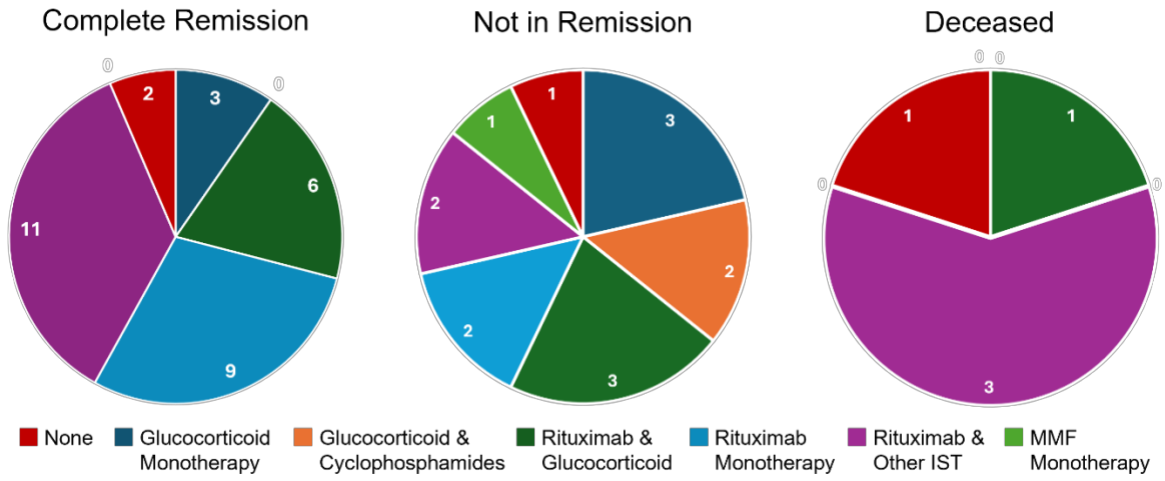

Supplemental Figure 4. Comparison of lowest FVIII activity level, maximum FVIII inhibitor titer, and current disease status by IST regimen for AHA patients with at least 12 weeks follow-up, (n=55).

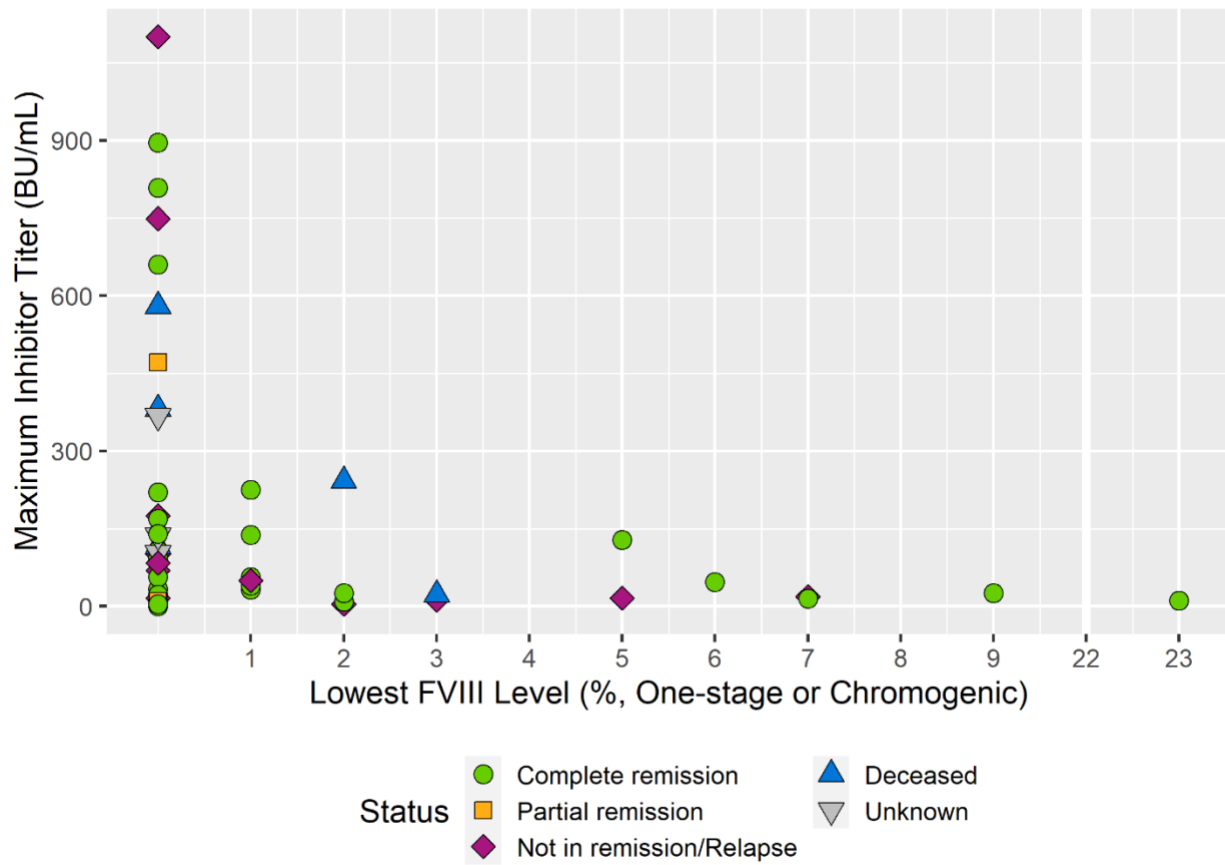

Supplement: BLOODA_ADV-2024-013882-mmc1.pdf [file BLOODA_ADV-2024-013882-mmc1.pdf]
